# Supplementary material
Source: publisher figshare collection journal article supplement (https://acs.figshare.com/ndownloader/files/3877138)
Supplement: Supplementary file 1 [file 3877138]

## Supporting Information for

# Syntheses and Characteristics of Water-Soluble, Pyridine-Based Poly(aryleneethynylene)s

Kai Seehafer,<sup>†</sup> Markus Bender,<sup>†</sup> S. Thimon Schwaebel<sup>†</sup> and Uwe H. F. Bunz<sup>\*,†,‡</sup>

<sup>†</sup> Organisch-Chemisches Institut, Ruprecht-Karls-Universität Heidelberg, Im Neuenheimer Feld 270, 69120 Heidelberg, Germany

<sup>‡</sup> CAM, Centre of Advanced Materials, Ruprecht-Karls-Universität Heidelberg, Im Neuenheimer Feld 225, 69120 Heidelberg, Germany

[uwe.bunz@oci.uni-heidelberg.de](mailto:uwe.bunz@oci.uni-heidelberg.de)

## Contents

|                                                 |           |
|-------------------------------------------------|-----------|
| <b>1. General Informations</b>                  | <b>2</b>  |
| <b>2. Synthetic Details and Analytical Data</b> | <b>5</b>  |
| <b>3. <sup>1</sup>H NMR-Spectra</b>             | <b>13</b> |
| <b>4. Evaluation of Stern-Volmer Constants</b>  | <b>25</b> |
| <b>5. Supplemental References</b>               | <b>27</b> |

## 1. General Informations

**Analytical thin layer chromatography (TLC)** was performed on Macherey & Nagel Polygram<sup>®</sup> SIL G/UV254 precoated plastic sheets. Components were visualized by observation under UV light (254 nm or 365 nm) or in the case of UV-inactive substances by using the suitably colouring solutions. The following colouring solutions were used for the visualization of UV-inactive substances:

KMnO<sub>4</sub> solution: 2.0 g KMnO<sub>4</sub>, 10.0 g K<sub>2</sub>CO<sub>3</sub>, 0.3 g NaOH, 200 mL distilled water.

Cer solution: 10.0 g Ce(SO)<sub>4</sub>, 25 g phosphomolybdic acid hydrate, 1 L distilled water, 50 mL conc. H<sub>2</sub>SO<sub>4</sub>.

**Flash column chromatography** was carried out using silica gel S (0.032 mm-0.062 mm), purchased from Sigma Aldrich, according to G. Nill, unless otherwise stated.<sup>1</sup>

**Melting points** (m. p.) were determined in open glass capillaries on a Melting Point Apparatus MEL-TEMP (Electrothermal, Rochford, UK) and are not corrected.

**<sup>1</sup>H NMR-spectra** were recorded at room temperature on the following spectrometers: Bruker Avance III 300 (300 MHz), Bruker Avance III 400 (400 MHz) and Bruker Avance III 600 (600 MHz). The data were interpreted in first order spectra. The spectra were recorded in CDCl<sub>3</sub> or D<sub>2</sub>O as indicated in each case. Chemical shifts are reported in  $\delta$  units relative to the solvent residual peak (CHCl<sub>3</sub> in CDCl<sub>3</sub> at  $\delta_H$  = 7.27 ppm, HDO in D<sub>2</sub>O at  $\delta_H$  = 4.79 ppm) or TMS ( $\delta_H$  = 0.00 ppm).<sup>2</sup> The following abbreviations are used to indicate the signal multiplicity: s (singlet), d (doublet), t (triplet), q (quartet), quin (quintet), sext (sextet), dd (doublet of doublet), dt (doublet of triplet), ddd (doublet of doublet of doublet), etc., bs (broad signal), m (multiplet). All NMR spectra were integrated and processed using ACD/Spectrum Processor.

**<sup>13</sup>C NMR-spectra** were recorded at room temperature on the following spectrometers: Bruker Avance III 300 (75 MHz), Bruker Avance III 400 (100 MHz) and Bruker Avance III

600 (150 MHz). The spectra were recorded in  $\text{CDCl}_3$  or  $\text{D}_2\text{O}$  as indicated in each case. Chemical shifts are reported in  $\delta$  units relative to the solvent signal:  $\text{CDCl}_3$  [ $\delta_{\text{C}} = 77.16$  ppm (central line of the triplet)] or TMS ( $\delta_{\text{C}} = 0.00$  ppm).

**High resolution mass spectra (HR-MS)** were either recorded on a Bruker ApexQe hybrid 9.4 T FT-ICR-MS ( $\text{ESI}^+$ ) or a Finnigan LCQ ( $\text{ESI}^+$ ) mass spectrometer at the Organisch-Chemisches Institut der Universität Heidelberg.

**IR spectra** were recorded on a JASCO FT/IR-4100. Substances were applied as a film, solid or in solution. The obtained data was processed with the software JASCO Spectra anager™ II.

**Elemental analyses** were carried out at the Organisch-Chemisches Institut der Universität Heidelberg.

Used **buffer solutions**: pH 1 ( $\text{HCl/KCl}$ ), pH 2 ( $\text{KH phthalate/HCl}$ ), pH 3 (citric acid/ $\text{NaOH/NaCl}$ ), pH 4 (citric acid/ $\text{NaOH/NaCl}$ ), pH 5 (citric acid/ $\text{NaOH}$ ), pH 6 (citric acid/ $\text{NaOH}$ ), pH 7 ( $\text{KH}_2\text{PO}_4/\text{Na}_2\text{HPO}_4$ ), pH 8 (borax/ $\text{HCl}$ ), pH 9 ( $\text{KH phthalate/NaOH}$ ), pH 10 (borax/ $\text{NaOH}$ ), pH 11 (boric acid/ $\text{NaOH/KCl}$ ), pH 12 ( $\text{Na}_2\text{HPO}_4/\text{NaOH}$ ), pH 13 (glycine/ $\text{NaOH/NaCl}$ ).

**Gel Permeation Chromatography (GPC):** Number- ( $M_n$ ) and weight-average ( $M_w$ ) molecular weights and polydispersities ( $\text{PDI}$ ,  $M_w/M_n$ ) were determined by GPC versus polystyrene standards. Measurements were carried out at room temperature in chloroform with PSS-SDV columns (8.0 mm x 30.0 mm, 5  $\mu\text{m}$  particles,  $10^2$ -,  $10^3$ - and  $10^5$ - Å pore size) on a Jasco PU-2050 GPC unit equipped with a Jasco UV-2075 UV- and a Jasco RI-2031 RI-detector.

All **absorption and emission spectra** were recorded using a Jasco V660 and Jasco FP6500 spectrometer.

**Pictures** were taken with a Canon EOS 7D camera equipped with an EF-S 60mm F/2.8 Macro lens.

**Fluorescence lifetimes  $\tau$**  were acquired by an exponential fit according to the least mean square with commercially available software HORIBA Scientific Decay Data Analyses 6 (DAS6) version 6.4.4. The luminescence decays were recorded with a HORIBA Scientific Fluorocube single photon counting system operated with HORIBA Scientific DataStation version 2.2.

**Quantum yields  $\Phi$**  were obtained by the absolute method described in ref.<sup>3</sup> using an Ulbricht sphere (band widths excitation: 2 nm; band widths emission: 3 nm). Given  $\Phi$  for each sample are **average** values of at least two independent measurements. Detailed informations are given in Table 1.

**Table 1. Parameters for the determination of quantum yields  $\Phi$ .**

| PAE      | solvent                             | absolute absorbance<br>at $\lambda_{\max}$ | excitation<br>[nm] | emission range<br>[nm] | $\Phi$ |
|----------|-------------------------------------|--------------------------------------------|--------------------|------------------------|--------|
| <b>1</b> | H <sub>2</sub> O                    | 0.087                                      | 440                | 430-750                | 0.07   |
|          | CH <sub>2</sub> Cl <sub>2</sub>     | 0.083                                      | 400                | 390-700                | 0.23   |
| <b>2</b> | H <sub>2</sub> O                    | 0.090                                      | 410                | 400-700                | 0.18   |
|          | CH <sub>2</sub> Cl <sub>2</sub>     | 0.118                                      | 410                | 400-700                | 0.23   |
| <b>3</b> | H <sub>2</sub> O                    | 0.097                                      | 450                | 440-750                | 0.17   |
|          | CH <sub>2</sub> Cl <sub>2</sub>     | 0.101                                      | 420                | 410-700                | 0.42   |
| <b>4</b> | H <sub>2</sub> O, pH 7 <sup>a</sup> | 0.094                                      | 420                | 410-750                | 0.10   |
| <b>5</b> | H <sub>2</sub> O                    | 0.093                                      | 480                | 470-750                | 0.01   |
|          | CH <sub>2</sub> Cl <sub>2</sub>     | 0.112                                      | 500                | 490-750                | 0.05   |
| <b>6</b> | H <sub>2</sub> O                    | 0.111                                      | 490                | 480-750                | 0.02   |
|          | CH <sub>2</sub> Cl <sub>2</sub>     | 0.103                                      | 500                | 490-750                | 0.06   |
| <b>7</b> | H <sub>2</sub> O                    | 0.105                                      | 410                | 400-750                | 0.33   |
|          | CH <sub>2</sub> Cl <sub>2</sub>     | 0.105                                      | 400                | 390-750                | 0.38   |

<sup>a</sup>buffered (see above).

## 2. Synthetic Details and Analytical Data

### Scheme 1. Synthesis of PAE 1

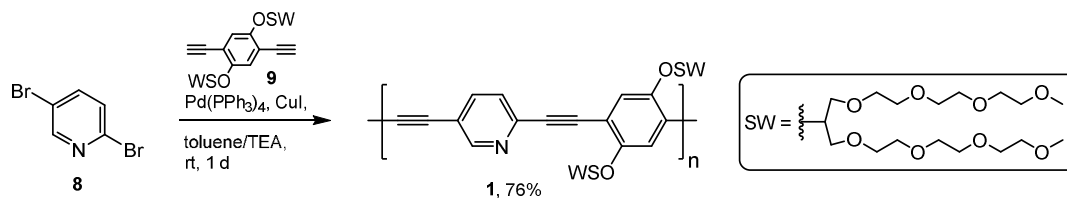

Compound **8** was purchased by Sigma-Aldrich®.

*Compound 9* was synthesized according to the literature.<sup>4</sup>

**Synthesis of 1.** Monomer **8** (178 mg, 0.75 mmol) and monomer **9** (668 mg, 0.75 mmol) were dissolved in degassed toluene/NEt<sub>3</sub> (1.5:1, 15 mL/10 mL). Pd(PPh<sub>3</sub>)<sub>4</sub> (43.3 mg, 37 μmol) and CuI (7.1 mg, 37 μmol) were added and the mixture was stirred at ambient temperature for 24 h. Brine and CH<sub>2</sub>Cl<sub>2</sub> were added, the aqueous layer was separated and extracted with CH<sub>2</sub>Cl<sub>2</sub>. The combined organic layers were dried over MgSO<sub>4</sub>, filtered and concentrated in vacuo. The crude product was dissolved in CH<sub>2</sub>Cl<sub>2</sub> and slowly added to an excess of *n*-hexane. The precipitate was dissolved in H<sub>2</sub>O and the resulting mixture was dialyzed against DI H<sub>2</sub>O for 3 d. After freezy-drying the residue was again dissolved in CH<sub>2</sub>Cl<sub>2</sub> and slowly added to an excess of *n*-hexane to gave **1** as spongy, red-brownish solid (548 mg, 76%). The *M<sub>n</sub>* was estimated to be 2.0 x 10<sup>4</sup> with a PDI of 2.5. <sup>1</sup>H NMR (600 MHz, CDCl<sub>3</sub>): δ = 8.56-8.71 (m, 1 H), 7.77-7.88 (m, 1 H), 7.50-7.59 (m, 1 H), 7.23-7.31 (m, 2 H), 4.49-4.61 (m, 2 H), 3.50-3.86 (m, 56 H), 3.36 (bs, 12 H) ppm. IR (cm<sup>-1</sup>): ν 2868, 1498, 1463, 1408, 1350, 1281, 1200, 1100, 947, 848. Due to low solubility, <sup>13</sup>C NMR spectrum could not be obtained.

## Scheme 2. Synthesis of monomer 12

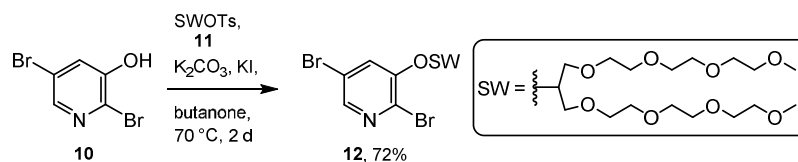

Compounds **10**<sup>5</sup> and **11**<sup>4</sup> were synthesized according to the literature.

**Synthesis of 12.** A solution of compound **10** (1.00 g, 3.95 mmol), tosylate **11** (2.34 g, 4.35 mmol), K<sub>2</sub>CO<sub>3</sub> (2.74 g, 19.75 mmol) and KI (32.8 mg, 0.20 mmol) in butanone (20 mL) was stirred at 70 °C for 2 days. Water and CH<sub>2</sub>Cl<sub>2</sub> were added, the aqueous layer was separated and extracted with CH<sub>2</sub>Cl<sub>2</sub>. The combined organic layers were dried over MgSO<sub>4</sub>, filtered and concentrated in vacuo. The crude product was purified by flash chromatography on silica gel [petroleum ether/ethyl acetate/CH<sub>2</sub>Cl<sub>2</sub>/MeOH (8/3/1.5/0.5)] to give compound **12** (1.75 g, 2.83 mmol, 72%) as colorless oil. <sup>1</sup>H NMR (400 MHz, CDCl<sub>3</sub>): δ = 8.04 (d, *J* = 2.1 Hz, 1 H), 7.67 (d, *J* = 2.1 Hz, 1 H), 4.55 (m, 1 H), 3.50-3.80 (m, 28 H), 3.36 (s, 6 H) ppm. <sup>13</sup>C NMR (100 MHz, CDCl<sub>3</sub>): δ = 153.22, 142.64, 132.50, 126.60, 119.46, 80.82, 72.06, 71.39, 71.17, 70.77, 70.75, 70.71, 70.66, 59.17 ppm. HR-MS (ESI<sup>+</sup>): *m/z* calcd. for C<sub>22</sub>H<sub>38</sub>NO<sub>9</sub>Br<sub>2</sub><sup>+</sup> 620.0887 [M+H]<sup>+</sup>; found 620.0895. C<sub>22</sub>H<sub>37</sub>NO<sub>9</sub>Br<sub>2</sub> (619.34): calcd. C 42.66, H 6.02, N 2.26, Br 25.80; found C 42.82, H 6.03, N 2.09, Br 25.34.

## Scheme 3. Synthesis of monomer 13

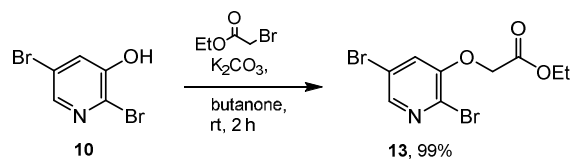

Compound **10** was synthesized according to the literature.<sup>5</sup>

**Synthesis of 13.** Ethylbromoacetate (526 μL, 4.74 mmol) was added to a solution of compound **10** (1.00 g, 3.95 mmol) and K<sub>2</sub>CO<sub>3</sub> (2.74 g, 19.75 mmol) in butanone (20 mL) and was stirred at ambient temperature for 2 h. Water and CH<sub>2</sub>Cl<sub>2</sub> were added, the aqueous layer was separated and extracted with CH<sub>2</sub>Cl<sub>2</sub>. The combined organic layers were dried over

MgSO<sub>4</sub>, filtered and concentrated in vacuo. The crude product was purified by flash chromatography on silica gel [petroleum ether/ethyl acetate (5/1)] to give compound **13** (1.33 g, 3.92 mmol, 99%) as colorless solid (m.p. 56-58 °C). <sup>1</sup>H NMR (600 MHz, CDCl<sub>3</sub>): δ = 8.11 (d, *J* = 1.9 Hz, 1 H), 7.18 (d, *J* = 1.9 Hz, 1 H), 4.72 (s, 2 H), 4.29 (q, *J* = 7.1 Hz, 2 H), 1.31 (t, *J* = 7.1 Hz, 3 H) ppm. <sup>13</sup>C NMR (150 MHz, CDCl<sub>3</sub>): δ = 167.33, 151.94, 143.25, 131.71, 123.42, 119.46, 66.24, 62.13, 14.26 ppm. HR-MS (ESI<sup>+</sup>): *m/z* calcd. for C<sub>9</sub>H<sub>10</sub>NO<sub>3</sub>Br<sub>2</sub><sup>+</sup> 337.9022 [M+H]<sup>+</sup>; found 337.9018. C<sub>9</sub>H<sub>9</sub>NO<sub>3</sub>Br<sub>2</sub> (338.98): calcd. C 31.89, H 2.68, N 4.13, Br 47.14; found C 31.94, H 2.73, N 4.32, Br 47.13.

#### Scheme 4. Synthesis of PAE 2

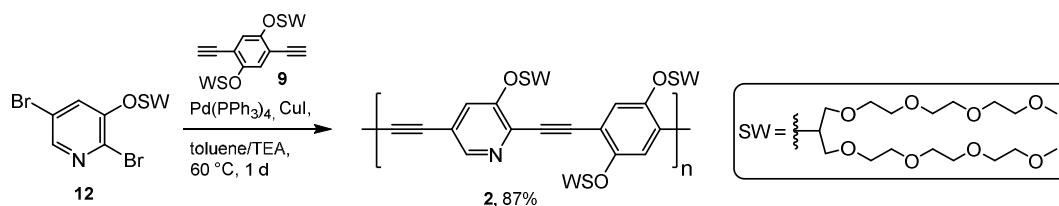

Compound **9** was synthesized according to the literature.<sup>4</sup>

**Synthesis of 2.** Monomer **12** (310 mg, 0.50 mmol) and monomer **9** (446 mg, 0.50 mmol) were dissolved in degassed toluene/NEt<sub>3</sub> (1.5:1, 9 mL/6 mL). Pd(PPh<sub>3</sub>)<sub>4</sub> (28.9 mg, 25 μmol) and CuI (4.8 mg, 25 μmol) were added and the mixture was stirred at 60 °C for 24 h. Brine and CH<sub>2</sub>Cl<sub>2</sub> were added, the aqueous layer was separated and extracted with CH<sub>2</sub>Cl<sub>2</sub>. The combined organic layers were dried over MgSO<sub>4</sub>, filtered and concentrated in vacuo. Two times, the crude product was dissolved in CHCl<sub>3</sub> and slowly added to an excess of *n*-hexane. The precipitate was dissolved in H<sub>2</sub>O, Na<sub>2</sub>EDTA (100 mg) was added, and the resulting mixture was dialyzed against DI H<sub>2</sub>O for 3 d. After freezy-drying the residue was again dissolved in CHCl<sub>3</sub> and slowly added to an excess of *n*-hexane to gave **2** as sticky, dark orange oil (588 mg, 87%). The *M<sub>n</sub>* was estimated to be 1.5 x 10<sup>4</sup> with a PDI of 2.7. <sup>1</sup>H NMR (600 MHz, CDCl<sub>3</sub>): δ = 8.21-8.37 (m, 1 H), 7.51-7.79 (m, 1 H), 7.15-7.24 (m, 2 H), 4.44-4.70 (m, 3 H), 3.41-3.86 (m, 84 H), 3.34 (bs, 18 H) ppm. IR (cm<sup>-1</sup>): ν 2868, 1498, 1455, 1399,

1350, 1199, 1095, 1039, 945, 850. Due to low solubility,  $^{13}\text{C}$  NMR spectrum could not be obtained.

### Scheme 5. Synthesis of PAE 3

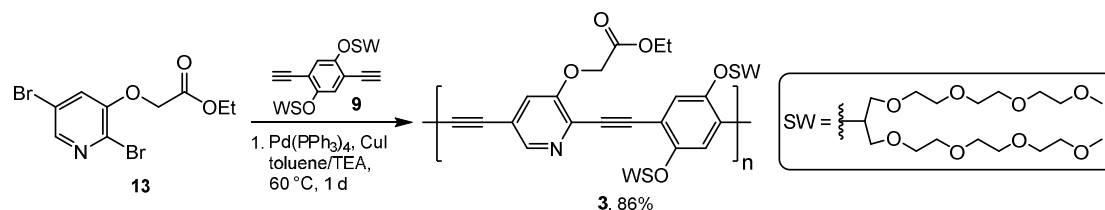

Compound **9** was synthesized according to the literature.<sup>4</sup>

**Synthesis of 3.** Monomer **13** (170 mg, 0.50 mmol) and monomer **9** (446 mg, 0.50 mmol) were dissolved in degassed toluene/ $\text{NEt}_3$  (1.5:1, 9 mL/6 mL).  $\text{Pd}(\text{PPh}_3)_4$  (28.9 mg, 25  $\mu\text{mol}$ ) and  $\text{CuI}$  (4.8 mg, 25  $\mu\text{mol}$ ) were added and the mixture was stirred at 60  $^\circ\text{C}$  for 24 h. Brine and  $\text{CH}_2\text{Cl}_2$  were added, the aqueous layer was separated and extracted with  $\text{CH}_2\text{Cl}_2$ . The combined organic layers were dried over  $\text{MgSO}_4$ , filtered and concentrated in vacuo. The crude product was dissolved in  $\text{CHCl}_3$  and slowly added to an excess of *n*-hexane. The precipitate was dissolved in  $\text{H}_2\text{O}$ ,  $\text{Na}_2\text{EDTA}$  (100 mg) was added, and the resulting mixture was dialyzed against DI  $\text{H}_2\text{O}$  for 3 d. After freezy-drying, the residue was again dissolved in  $\text{CHCl}_3$  and slowly added to an excess of *n*-hexane to give **3** as sticky, dark orange oil (459 mg, 86%). The  $M_n$  was estimated to be  $1.4 \times 10^4$  with a PDI of 2.4.  $^1\text{H}$  NMR (600 MHz,  $\text{CDCl}_3$ ):  $\delta$  = 8.30-8.42 (m, 1 H), 7.17-7.35 (m, 3 H), 4.82-4.91 (m, 2 H), 4.48-4.62 (m, 2 H), 4.24-4.32 (m, 2 H), 3.48-3.85 (m, 56 H), 3.35 (bs, 12 H), 1.28-1.33 (m, 3 H) ppm. IR ( $\text{cm}^{-1}$ ):  $\nu$  2869, 1754, 1498, 1456, 1401, 1200, 1094, 947, 851. Due to low solubility,  $^{13}\text{C}$  NMR spectrum could not be obtained.



### Scheme 6. Synthesis of PAE 4

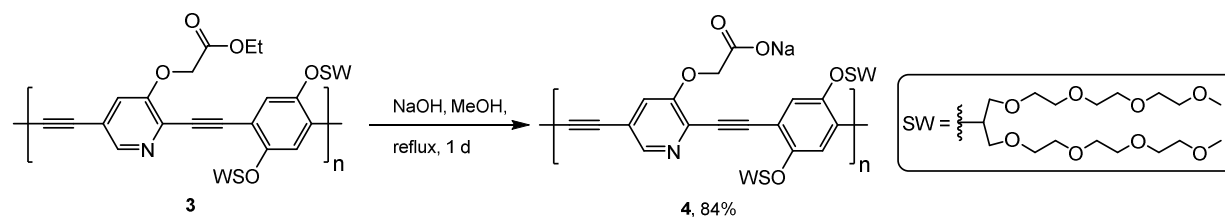

**Synthesis of 4.** NaOH (150 mg, 3.75 mmol) was added to a solution of polymer **3** (205 mg, 0.19 mmol) in MeOH (40 mL) and the resulting mixture was refluxed for 24 h. The solvent was reduced in vacuo, the residue was dissolved in H<sub>2</sub>O and dialyzed against DI H<sub>2</sub>O for 3 d. After freezy-drying, the residue was dissolved in MeOH and slowly added to an excess of Et<sub>2</sub>O to give **4** as sticky, dark orange oil (171 mg, 84%). The *M<sub>n</sub>* and PDI result from polymer **3**. <sup>1</sup>H NMR (600 MHz, D<sub>2</sub>O): δ = 8.00-8.45 (m, 1 H), 6.95-7.83 (m, 3 H), 4.49-4.80 (m, 4 H), 3.41-4.07 (m, 56 H), 3.31 (bs, 12 H) ppm. IR (cm<sup>-1</sup>): ν 2869, 1498, 1455, 1400, 1350, 1199, 1093, 945, 850. Due to low solubility, <sup>13</sup>C NMR spectrum could not be obtained.

### Scheme 7. Synthesis of PAE 5

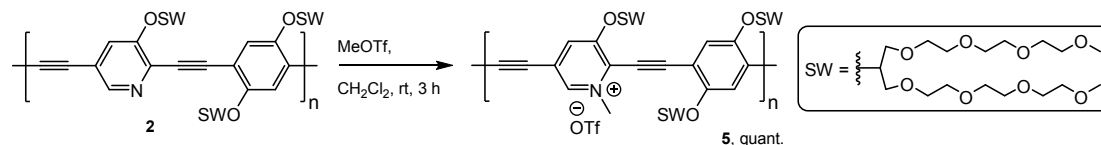

**Synthesis of 5.** Methyl trifluoromethanesulfonate (6.3 μL, 55.7 μmol) was added to a solution of polymer **2** (37.2 mg, 27.6 μmol) in CH<sub>2</sub>Cl<sub>2</sub> (1 mL) and the resulting mixture was stirred at ambient temperature for 3 h. The solvent and MeOTf were evaporated in vacuo to give **5** as red solid (42 mg, quant.). The *M<sub>n</sub>* and PDI result from polymer **2**. <sup>1</sup>H NMR (600 MHz, D<sub>2</sub>O): δ = 8.48-8.93 (m, 2 H), 7.54-7.64 (m, 2 H), 5.10-5.19 (bs, 1 H), 4.84-4.95 (bs, 2 H), 4.44-4.63 (m, 3 H), 3.50-4.00 (m, 84 H), 3.30-3.34 (m, 18 H) ppm. IR (cm<sup>-1</sup>): ν 2872, 1272, 1223, 1097, 1030, 948, 850, 637. Due to low solubility, <sup>13</sup>C NMR spectrum could not be obtained.

### Scheme 8. Synthesis of PAE 6

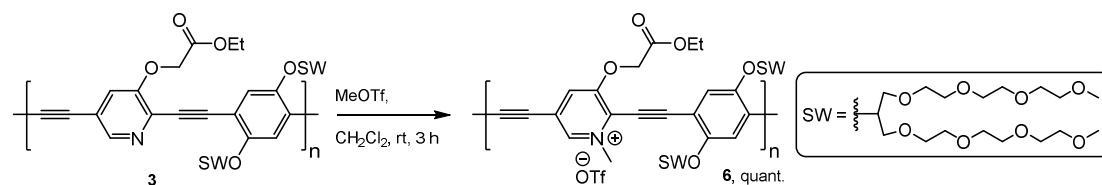

**Synthesis of 6.** Methyl trifluoromethanesulfonate (42.6  $\mu\text{L}$ , 0.38 mmol) was added to a solution of polymer **3** (201 mg, 0.18 mmol) in  $\text{CH}_2\text{Cl}_2$  (2 mL) and the resulting mixture was stirred at ambient temperature for 3 h. The solvent and MeOTf were evaporated in vacuo to give **6** as red solid (232 mg, quant.). The  $M_n$  and PDI result from polymer **3**.  $^1\text{H}$  NMR (600 MHz,  $\text{D}_2\text{O}$ ):  $\delta$  = 8.46-8.92 (m, 1 H), 7.25-7.92 (m, 3 H), 5.14-5.40 (m, 2 H), 4.85-5.00 (bs, 2 H), 4.21-4.72 (m, 5 H), 3.37-4.18 (m, 56 H), 3.18-3.33 (m, 12 H), 1.28-1.49 (m, 3 H) ppm. IR ( $\text{cm}^{-1}$ ):  $\nu$  2872, 1749, 1262, 1220, 1093, 1029, 851, 636. Due to low solubility,  $^{13}\text{C}$  NMR spectrum could not be obtained.

### Scheme 9. Synthesis of compound 14

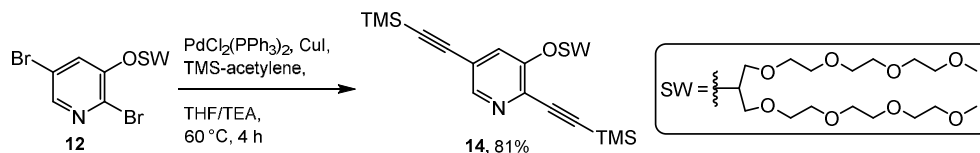

**Synthesis of 14.** Compound **12** (500 mg, 0.81 mmol) was dissolved in degassed toluene/piperidine (1:1, 2 mL/2 mL).  $\text{PdCl}_2(\text{PPh}_3)_2$  (28.3 mg, 40  $\mu\text{mol}$ ) and  $\text{CuI}$  (8.0 mg, 40  $\mu\text{mol}$ ) were added. Subsequently TMS-acetylene was added dropwise and the resulting mixture was stirred at 70  $^\circ\text{C}$  for 4 h. The reaction mixture was quenched by the addition of aqueous  $\text{NH}_4\text{Cl}$  (15 mL). The aqueous layer was separated and extracted with  $\text{CH}_2\text{Cl}_2$ . The combined organic layers were dried over  $\text{MgSO}_4$ , filtered and concentrated in vacuo. The crude product was purified by flash chromatography on silica gel [petroleum ether/ethyl acetate/ $\text{CH}_2\text{Cl}_2$ /MeOH (7/1/1/0.5)] to give compound **14** (427 mg, 0.65 mmol, 81%) as brown oil.  $^1\text{H}$  NMR (600 MHz,  $\text{CDCl}_3$ ):  $\delta$  = 8.25 (d,  $J$  = 1.5 Hz, 1 H), 7.49 (d,  $J$  = 1.5 Hz, 1 H), 4.56

(m, 1 H), 3.53-3.80 (m, 28 H), 3.38 (s, 6 H), 0.27 (s, 18 H) ppm.  $^{13}\text{C}$  NMR (150 MHz,  $\text{CDCl}_3$ ):  $\delta$  = 155.82, 145.43, 133.67, 125.26, 120.13, 101.15, 100.99, 100.39, 99.71, 79.61, 71.90, 71.28, 70.83, 70.63, 70.60, 70.56, 70.51, 59.03, 0.24 ppm. HR-MS ( $\text{ESI}^+$ ):  $m/z$  calcd. for  $\text{C}_{32}\text{H}_{56}\text{NO}_9\text{Si}_2^+$  654.3488  $[\text{M}+\text{H}]^+$ ; found 654.3495.  $\text{C}_{32}\text{H}_{55}\text{NO}_9\text{Si}_2$  (653.96): calcd. C 58.77, H 8.48, N 2.14; found C 58.95, H 8.40, N 2.15.

#### Scheme 10. Synthesis of monomer 15

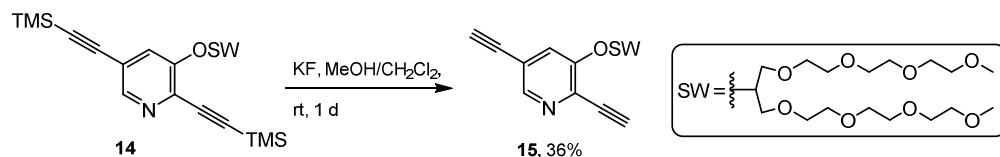

**Synthesis of 15.** Compound **14** (409 mg, 0.62 mmol) was dissolved in MeOH (10 mL). KF (145 mg, 2.50 mmol) in Methanol (10 mL) was added and stirred at ambient temperature overnight. The reaction mixture was quenched by the addition of  $\text{SiO}_2$ , filtrated and concentrated in vacuo. Flash chromatography on silica gel [petroleum ether/ethyl acetate/ $\text{CH}_2\text{Cl}_2$ /MeOH (5/3/1/1)] of the crude product afforded compound **15** (114 mg, 0.22 mmol, 36%) as yellow oil.  $^1\text{H}$  NMR (300 MHz,  $\text{CDCl}_3$ ):  $\delta$  = 8.29 (d,  $J$  = 1.4 Hz, 1 H), 7.60 (d,  $J$  = 1.4 Hz, 1 H), 4.58 (m, 1 H), 3.53-3.82 (m, 28 H), 3.46 (s, 1 H), 3.38 (s, 6 H), 3.29 (s, 1 H) ppm.  $^{13}\text{C}$  NMR (75 MHz,  $\text{CDCl}_3$ ):  $\delta$  = 156.22, 145.44, 133.35, 125.26, 119.52, 82.99, 81.88, 80.02, 79.74, 79.49, 71.92, 71.25, 70.94, 70.63, 70.56, 70.51, 59.01 ppm. HR-MS ( $\text{ESI}^+$ ):  $m/z$  calcd. for  $\text{C}_{26}\text{H}_{40}\text{NO}_9^+$  510.2698  $[\text{M}+\text{H}]^+$ ; found 510.2699.  $\text{C}_{26}\text{H}_{39}\text{NO}_9$  (509.60): calcd. C 61.28, H 7.71, N 2.75; found C 61.01, H 7.81, N 2.83.

**Scheme 11. Synthesis of PAE 7**

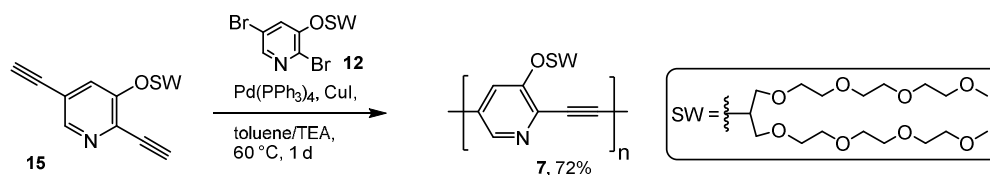

**Synthesis of 7.** Monomer **15** (230 mg, 0.45 mmol) and monomer **12** (451 mg, 0.45 mmol) were dissolved in degassed toluene/ $\text{NEt}_3$  (1.5:1, 9 mL/6 mL).  $\text{Pd(PPh}_3)_4$  (26.1 mg, 23  $\mu\text{mol}$ ) and  $\text{CuI}$  (4.3 mg, 23  $\mu\text{mol}$ ) were added and the mixture was stirred at 60  $^\circ\text{C}$  for 24 h. Brine and  $\text{CH}_2\text{Cl}_2$  were added, the aqueous layer was separated and extracted with  $\text{CH}_2\text{Cl}_2$ . The combined organic layers were dried over  $\text{MgSO}_4$ , filtered and concentrated in vacuo. Two times, the crude product was dissolved in  $\text{CHCl}_3$  and slowly added to an excess of *n*-hexane. The precipitate was dissolved in  $\text{H}_2\text{O}$ ,  $\text{Na}_2\text{EDTA}$  (100 mg) was added, and the resulting mixture was dialyzed against DI  $\text{H}_2\text{O}$  for 3 d. After freezy-drying the residue was again dissolved in  $\text{CHCl}_3$  and slowly added to an excess of *n*-hexane to gave **2** as sticky, dark brown oil (316 mg, 72%). The  $M_n$  was estimated to be  $1.4 \times 10^4$  with a PDI of 3.1.  $^1\text{H}$  NMR (600 MHz,  $\text{CDCl}_3$ ):  $\delta$  = 8.26-8.40 (m, 1 H), 7.62-7.80 (m, 1 H), 4.62-4.69 (m, 1 H), 3.45-3.86 (m, 28 H), 3.34 (bs, 6 H) ppm. IR ( $\text{cm}^{-1}$ ):  $\nu$  2871, 1720, 1578, 1471, 1404, 1351, 1233, 1198, 1095, 940, 849, 756, 542, 446, 404. Due to low solubility,  $^{13}\text{C}$  NMR spectrum could not be obtained.

### 3. $^1\text{H}$ NMR-Spectra

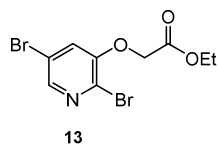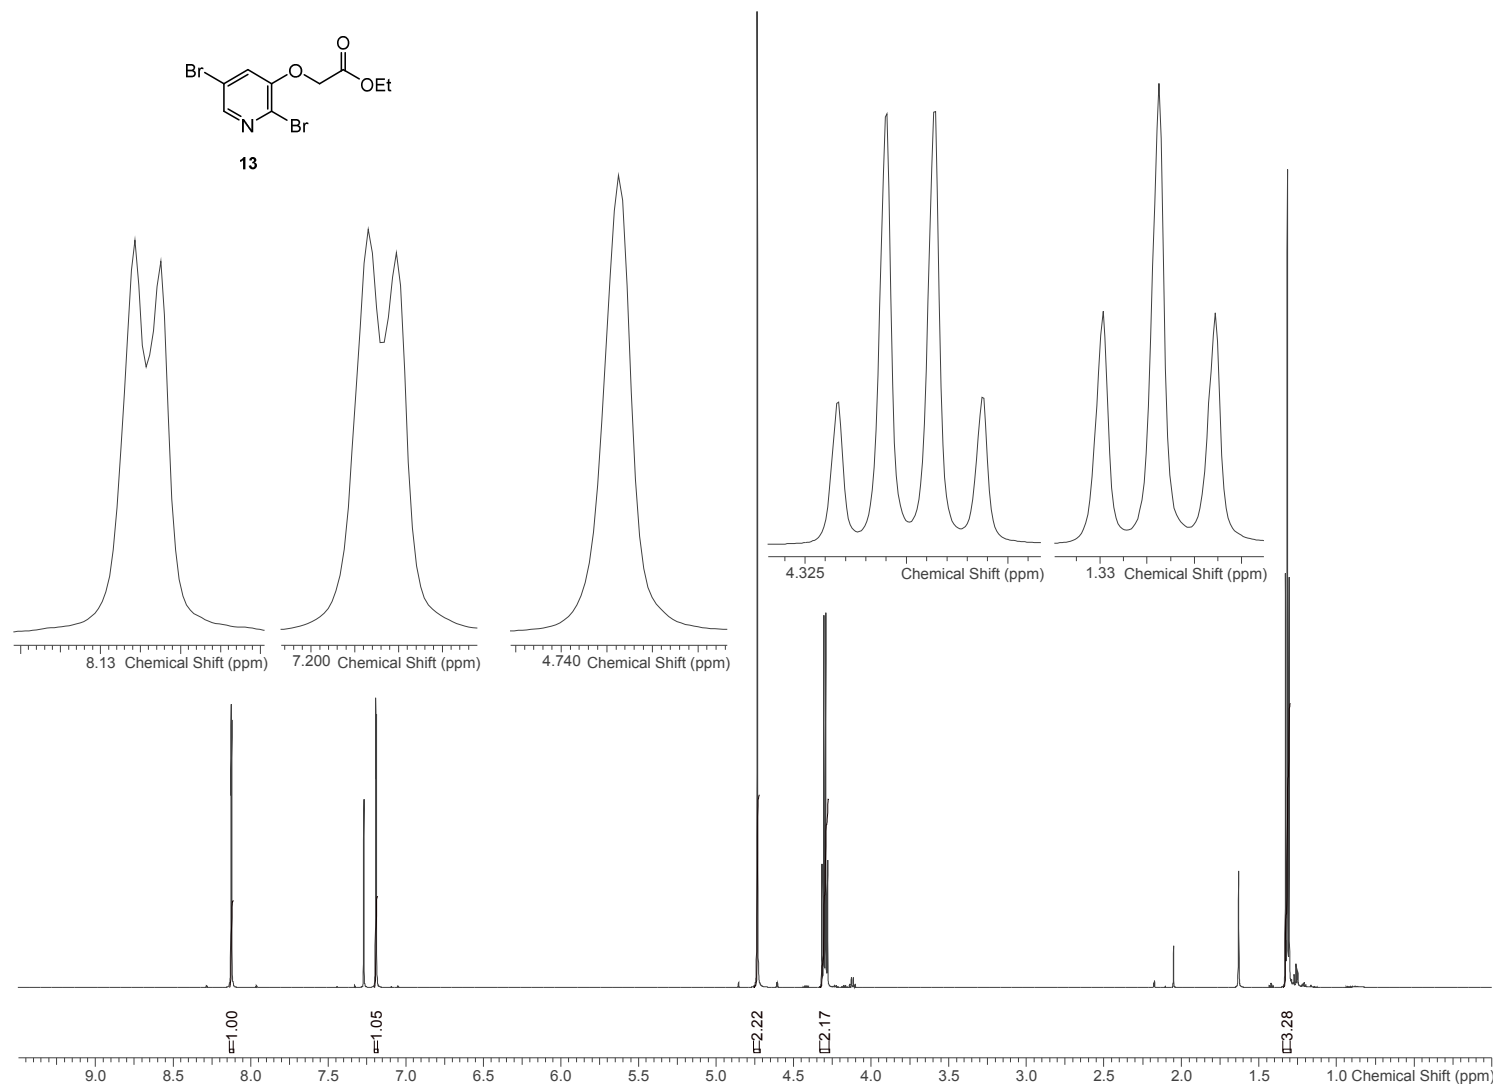

#### Current Data Parameters

NAME e131004ubks.14  
EXPNO 2  
PROCNO 1

#### F2 - Acquisition Parameters

Date 20131007  
Time 8.42  
INSTRUM spect  
PROBHD 5 mm CPQCI-1H-  
PULPROG zg30  
TD 131072  
SOLVENT CDCl<sub>3</sub>  
NS 64  
DS 2  
SWH 18028.846 Hz  
FIDRES 0.137549 Hz  
AQ 3.6350634 sec  
RG 15.35  
DW 27.733 usec  
DE 12.00 usec  
TE 295 K  
D1 0.1000000 sec  
TD0 8

#### ===== CHANNEL f1 =====

NUC1 1H  
P1 7.63 usec  
PLW1 7.5000000 W  
SFO1 300.5115025 MHz

#### F2 - Processing parameters

SI 65536  
SF 600.2438290 MHz  
WDW EM  
SSB 0  
LB 0.30 Hz  
GB 0  
PC 1.00



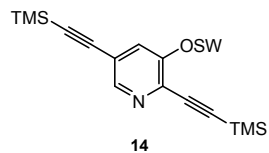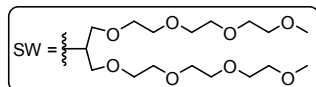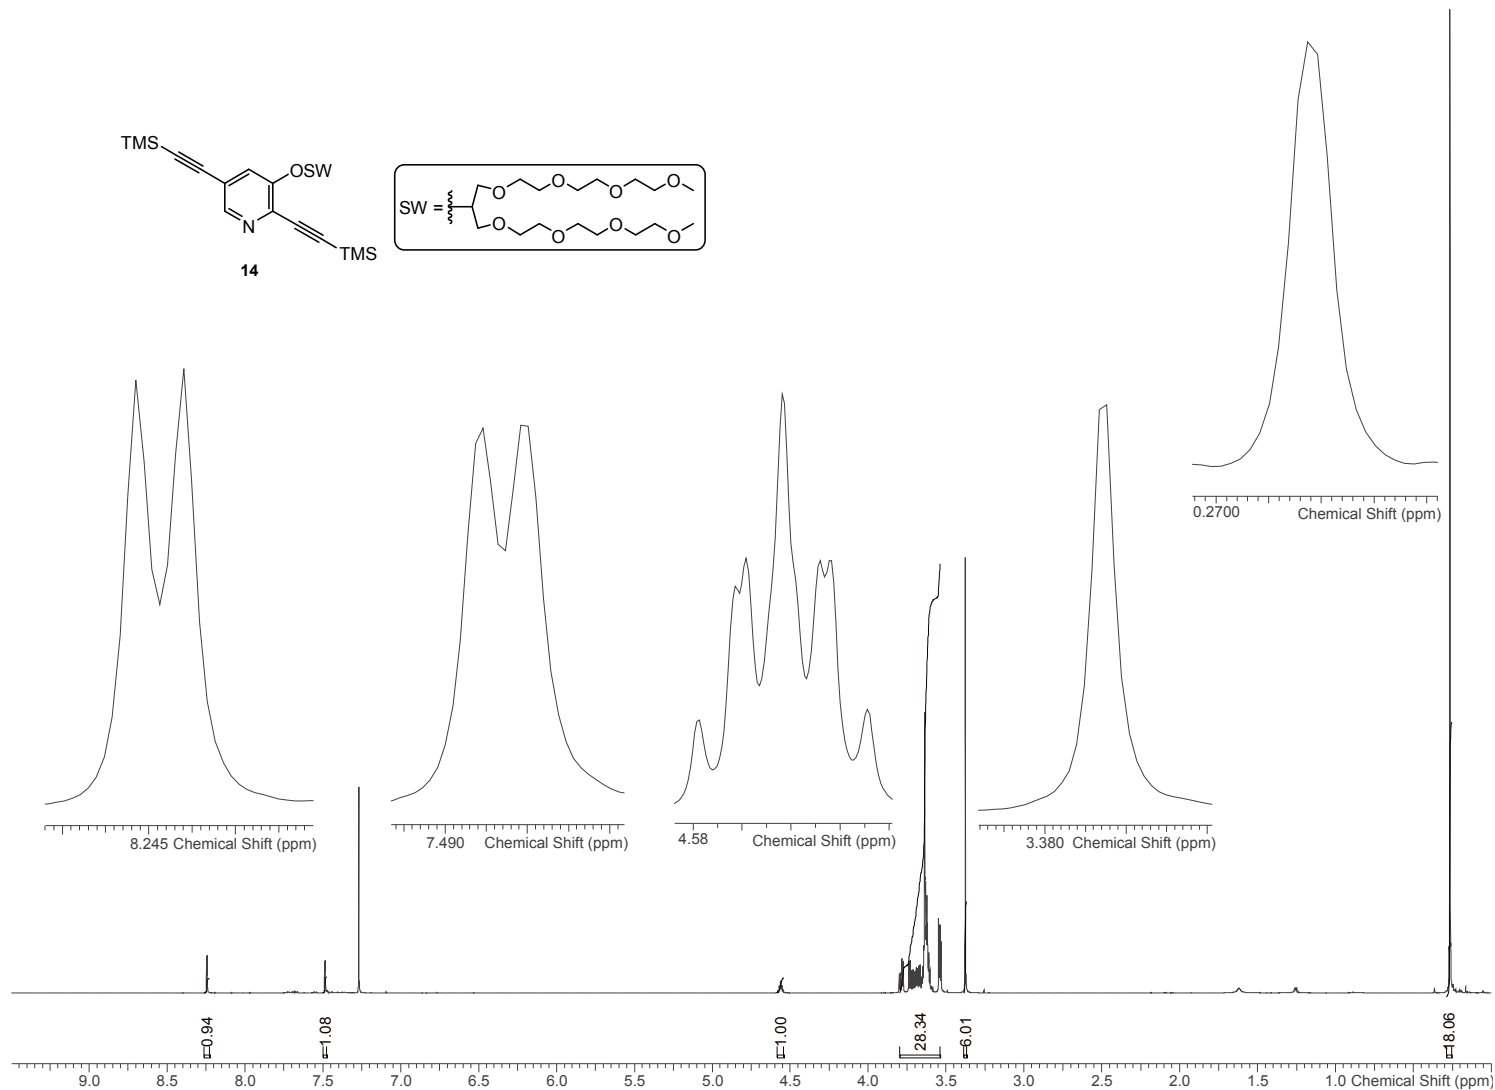

#### Current Data Parameters

NAME e140225ubmb.03  
EXPNO 2  
PROCNO 1

#### F2 - Acquisition Parameters

Date 20140225  
Time 10.53  
INSTRUM spect  
PROBHD 5 mm CPQCI-1H-  
PULPROG zg30  
TD 131072  
SOLVENT CDCl<sub>3</sub>  
NS 128  
DS 2  
SWH 18028.846 Hz  
FIDRES 0.137549 Hz  
AQ 3.6350634 sec  
RG 15.35  
DW 27.733 usec  
DE 12.00 usec  
TE 295 K  
D1 0.1000000 sec  
TD0 16

#### ===== CHANNEL f1 =====

NUC1 1H  
P1 7.63 usec  
PLW1 7.5000000 W  
SFO1 600.2468302 MHz

#### F2 - Processing parameters

SI 65536  
SF 600.2439367 MHz  
WDW EM  
SSB 0  
LB 0.30 Hz  
GB 0  
PC 1.00



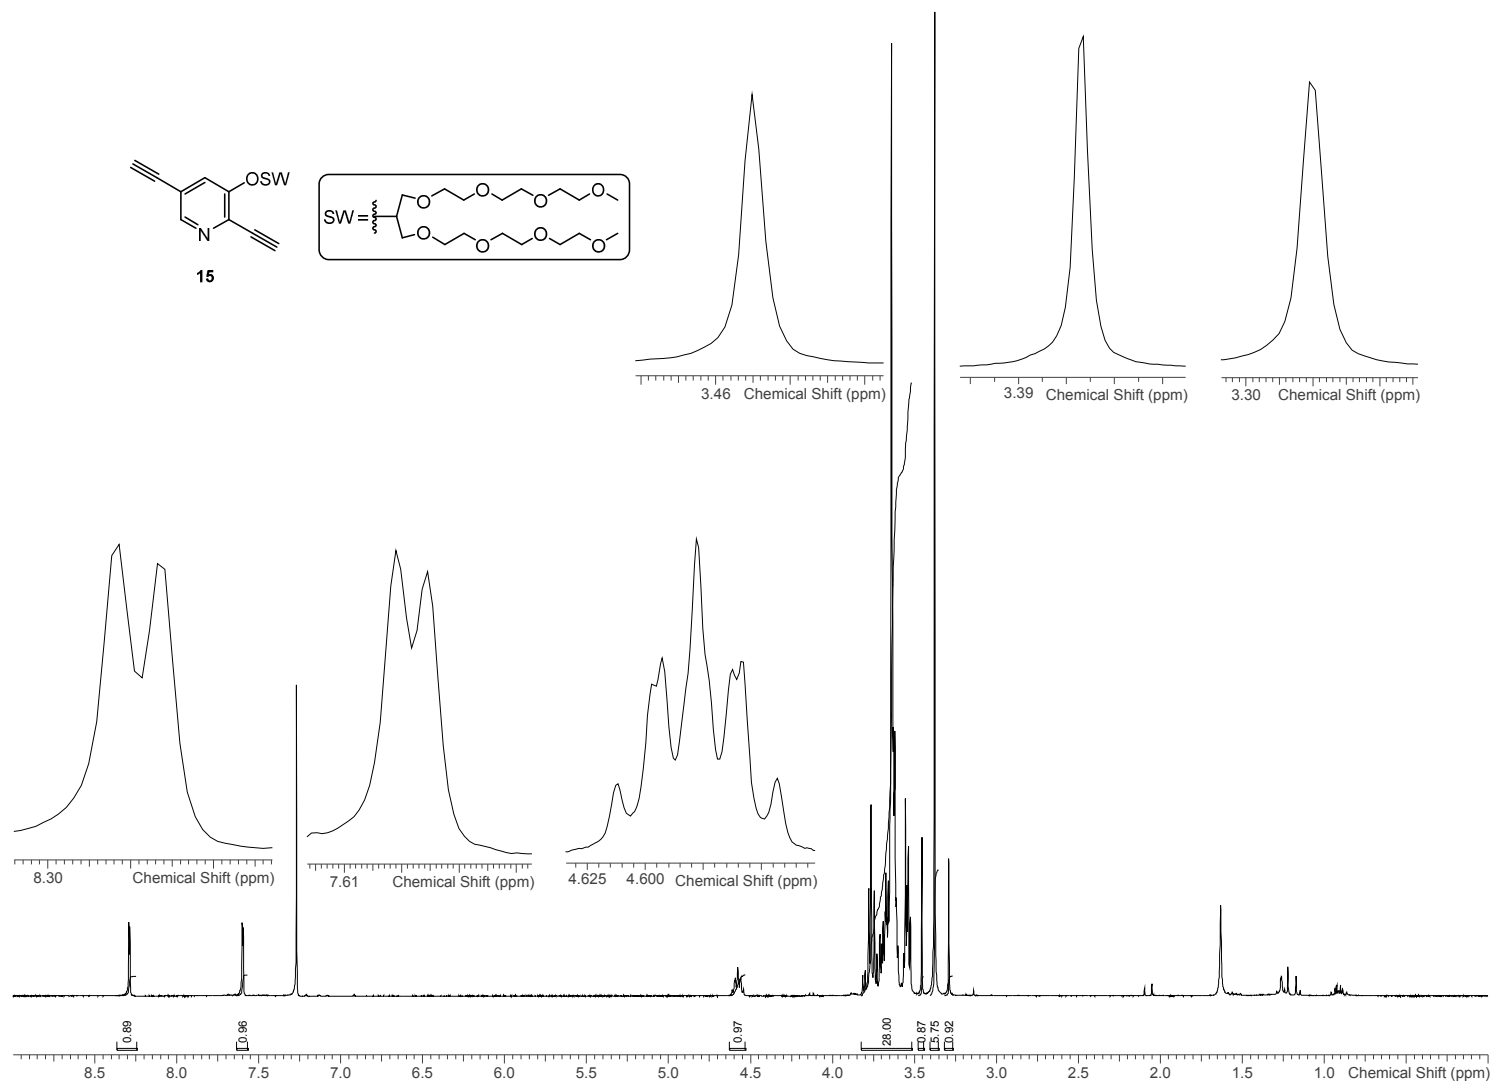

#### Current Data Parameters

NAME b140221ubmb.01  
EXPNO 2  
PROCNO 1

#### F2 - Acquisition Parameters

Date 20140222  
Time 9.12  
INSTRUM spect  
PROBHD 5 mm PATXO 31P  
PULPROG zg30  
TD 65536  
SOLVENT  $\text{CDCl}_3$   
NS 128  
DS 2  
SWH 8992.806 Hz  
FIDRES 0.137219 Hz  
AQ 3.6438515 sec  
RG 574.7  
DW 55.600 usec  
DE 6.00 usec  
TE 298.2 K  
D1 0.1000000 sec  
TD0 16

#### ===== CHANNEL f1 =====

NUC1  $^1\text{H}$   
P1 11.50 usec  
PL1 -3.00 dB  
SFO1 300.1315007 MHz

#### F2 - Processing parameters

SI 32768  
SF 300.1300000 MHz  
WDW EM  
SSB 0  
LB 0.30 Hz  
GB 0  
PC 1.00

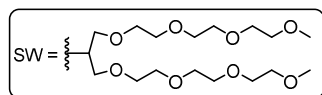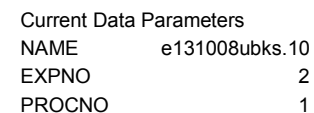

|         |                   |
|---------|-------------------|
| Date    | 20131009          |
| Time    | 6.04              |
| INSTRUM | spect             |
| PROBH   | 5 mm CPQCI-1H-    |
| PULPROG | zg30              |
| TD      | 131072            |
| SOLVENT | CDCl <sub>3</sub> |
| NS      | 128               |
| DS      | 2                 |
| SWH     | 18028.846 Hz      |
| FIDRES  | 0.137549 Hz       |
| AQ      | 3.6350634 sec     |
| RG      | 15.35             |
| DW      | 27.733 usec       |
| DE      | 12.00 usec        |
| TE      | 295 K             |
| D1      | 0.10000000 sec    |
| TD0     | 16                |

|      |                 |
|------|-----------------|
| NUC1 | 1H              |
| P1   | 7.63 usec       |
| PLW1 | 7.50000000 W    |
| SFO1 | 600.3468302 MHz |

|     |                 |
|-----|-----------------|
| SI  | 65536           |
| SF  | 600.2438290 MHz |
| WDW | EM              |
| SSB | 0               |
| LB  | 0.30 Hz         |
| GB  | 0               |
| PC  | 1.00            |

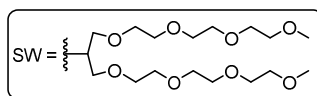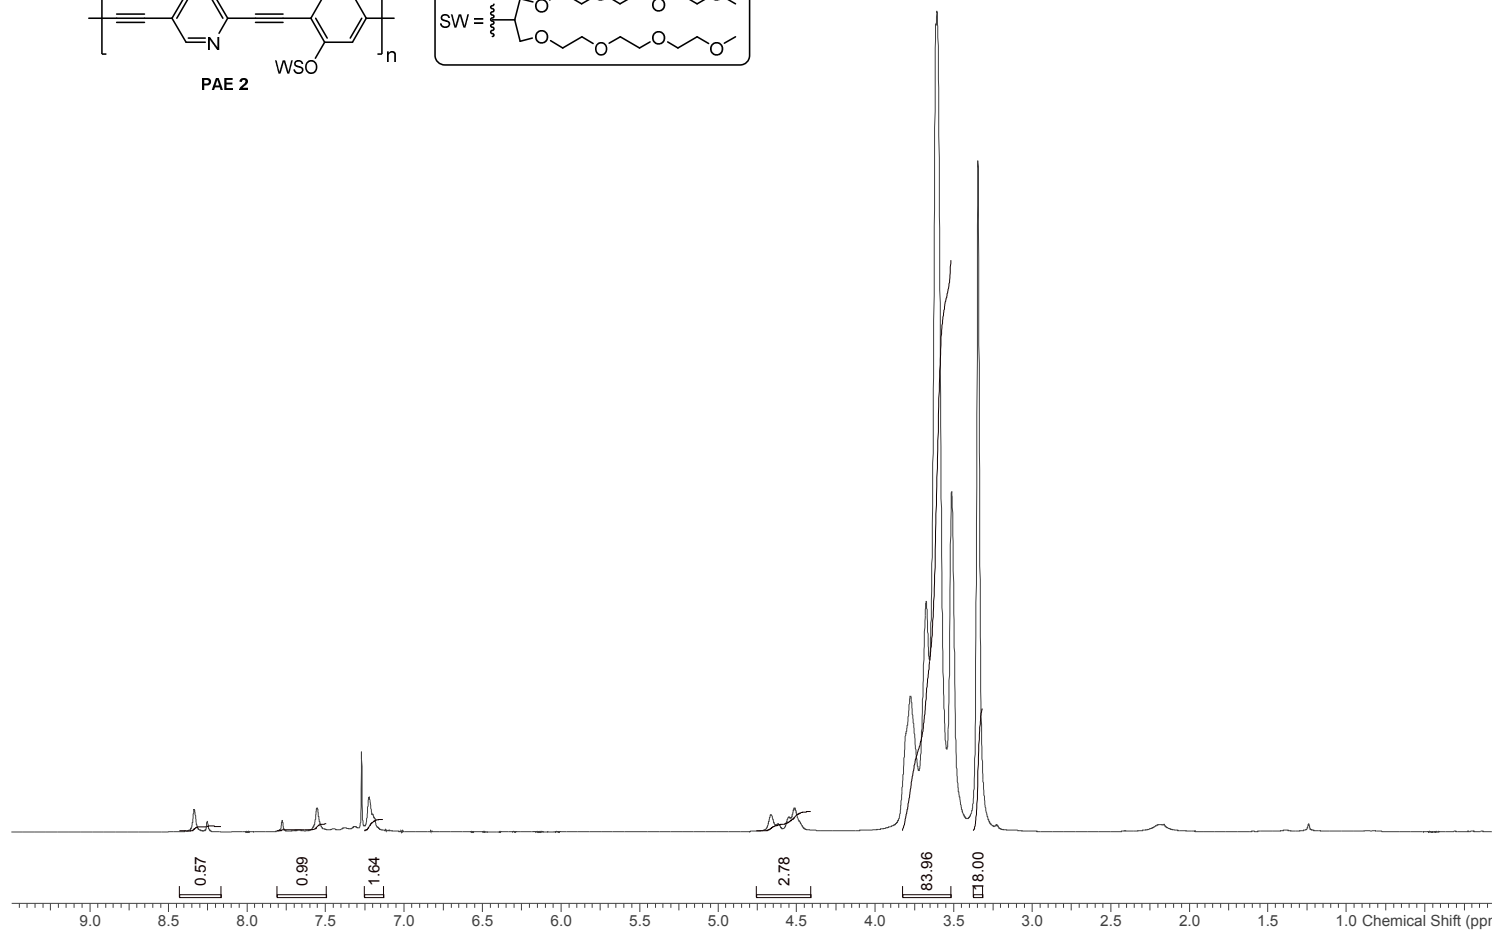

```
NAME          e131004ubks.18
EXPNO          2
PROCNO         1
```

|         |                   |
|---------|-------------------|
| Date    | 20131029          |
| Time    | 18.18             |
| INSTRUM | spect             |
| PROBH   | 5 mm CPQCI-1H-    |
| PULPROG | zg30              |
| TD      | 131072            |
| SOLVENT | CDCl <sub>3</sub> |
| NS      | 128               |
| DS      | 2                 |
| SWH     | 18028.846 Hz      |
| FIDRES  | 0.137549 Hz       |
| AQ      | 3.6350634 sec     |
| RG      | 7.02              |
| DW      | 27.733 usec       |
| DE      | 12.00 usec        |
| TE      | 295 K             |
| D1      | 0.10000000 sec    |
| TD0     | 16                |

|      |                 |
|------|-----------------|
| NUC1 | 1H              |
| P1   | 7.63 usec       |
| PLW1 | 7.50000000 W    |
| SFO1 | 600.2468302 MHz |

|     |                 |
|-----|-----------------|
| SI  | 65536           |
| SF  | 600.2439196 MHz |
| WDW | EM              |
| SSB | 0               |
| LB  | 0.30 Hz         |
| GB  | 0               |
| PC  | 1.00            |

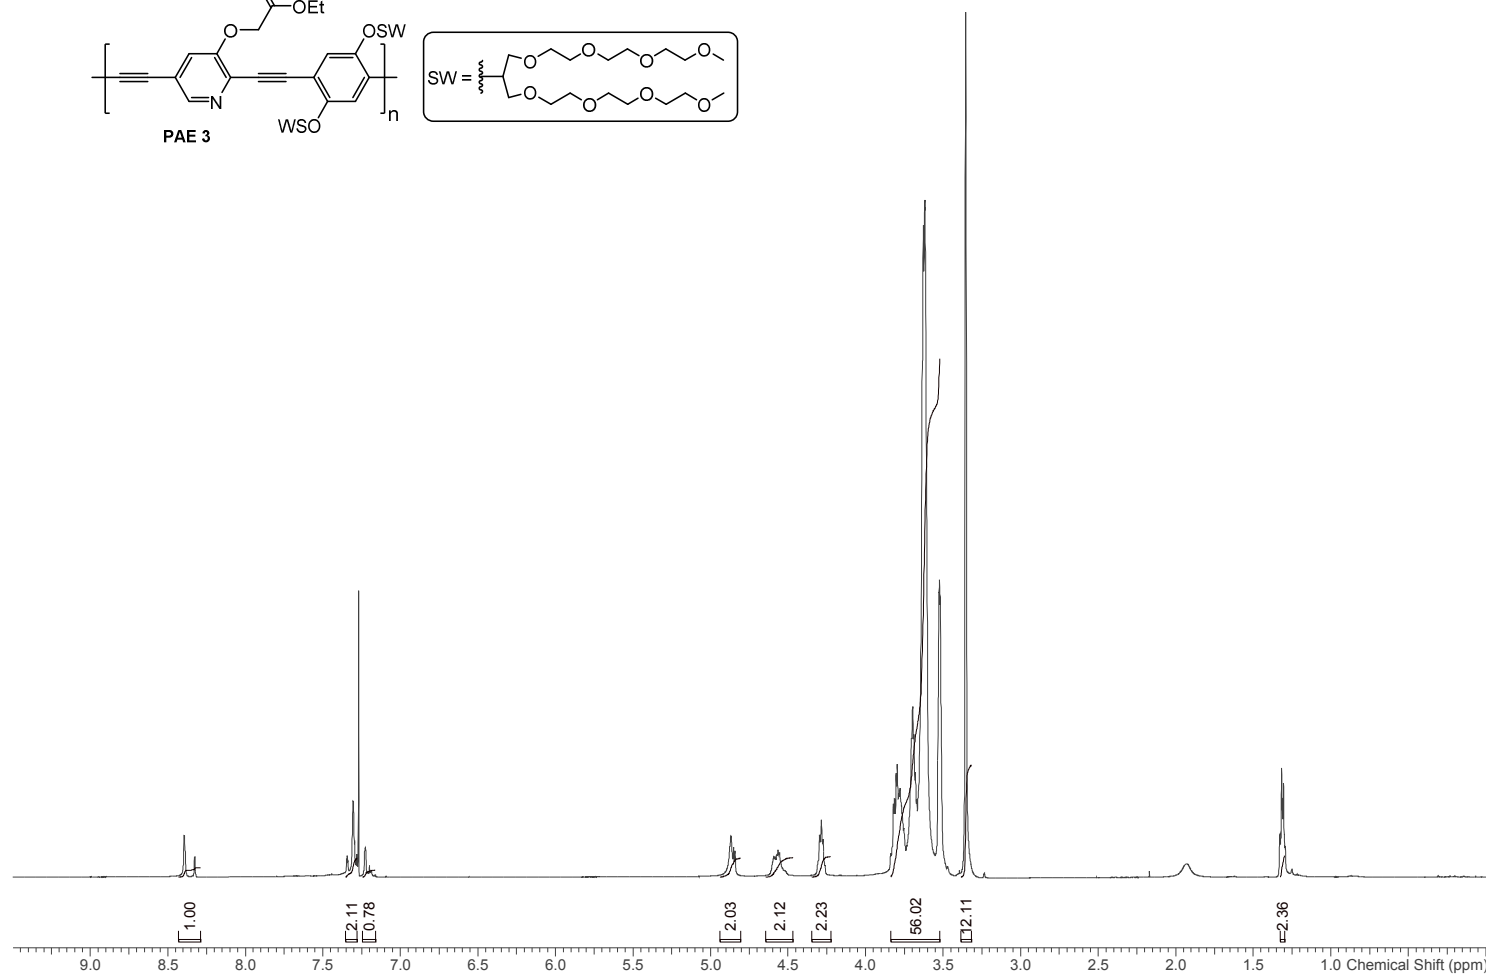

|    |      |
|----|------|
| GB | 0    |
| BC | 1.00 |

## Current Data Parameters

NAME e131106ubks.19  
EXPNO 2  
PROCNO 1

## F2 - Acquisition Parameters

Date 20131107  
Time 1.13  
INSTRUM spect  
PROBHD 5 mm CPQCI-1H-  
PULPROG zg30  
TD 131072  
SOLVENT D<sub>2</sub>O  
NS 128  
DS 2  
SWH 18028.846 Hz  
FIDRES 0.137549 Hz  
AQ 3.6350634 sec  
RG 7.02  
DW 27.733 usec  
DE 12.00 usec  
TE 295 K  
D1 0.10000000 sec  
TD0 16

## ===== CHANNEL f1 =====

NUC1 1H  
P1 7.63 usec  
PLW1 7.50000000 W  
SFO1 600.2468302

## F2 - Processing parameters

SI 65536  
SF 600.2438290 MHz  
WDW EM  
SSB 0  
LB 0.30 Hz  
GB 0  
PC 1.00

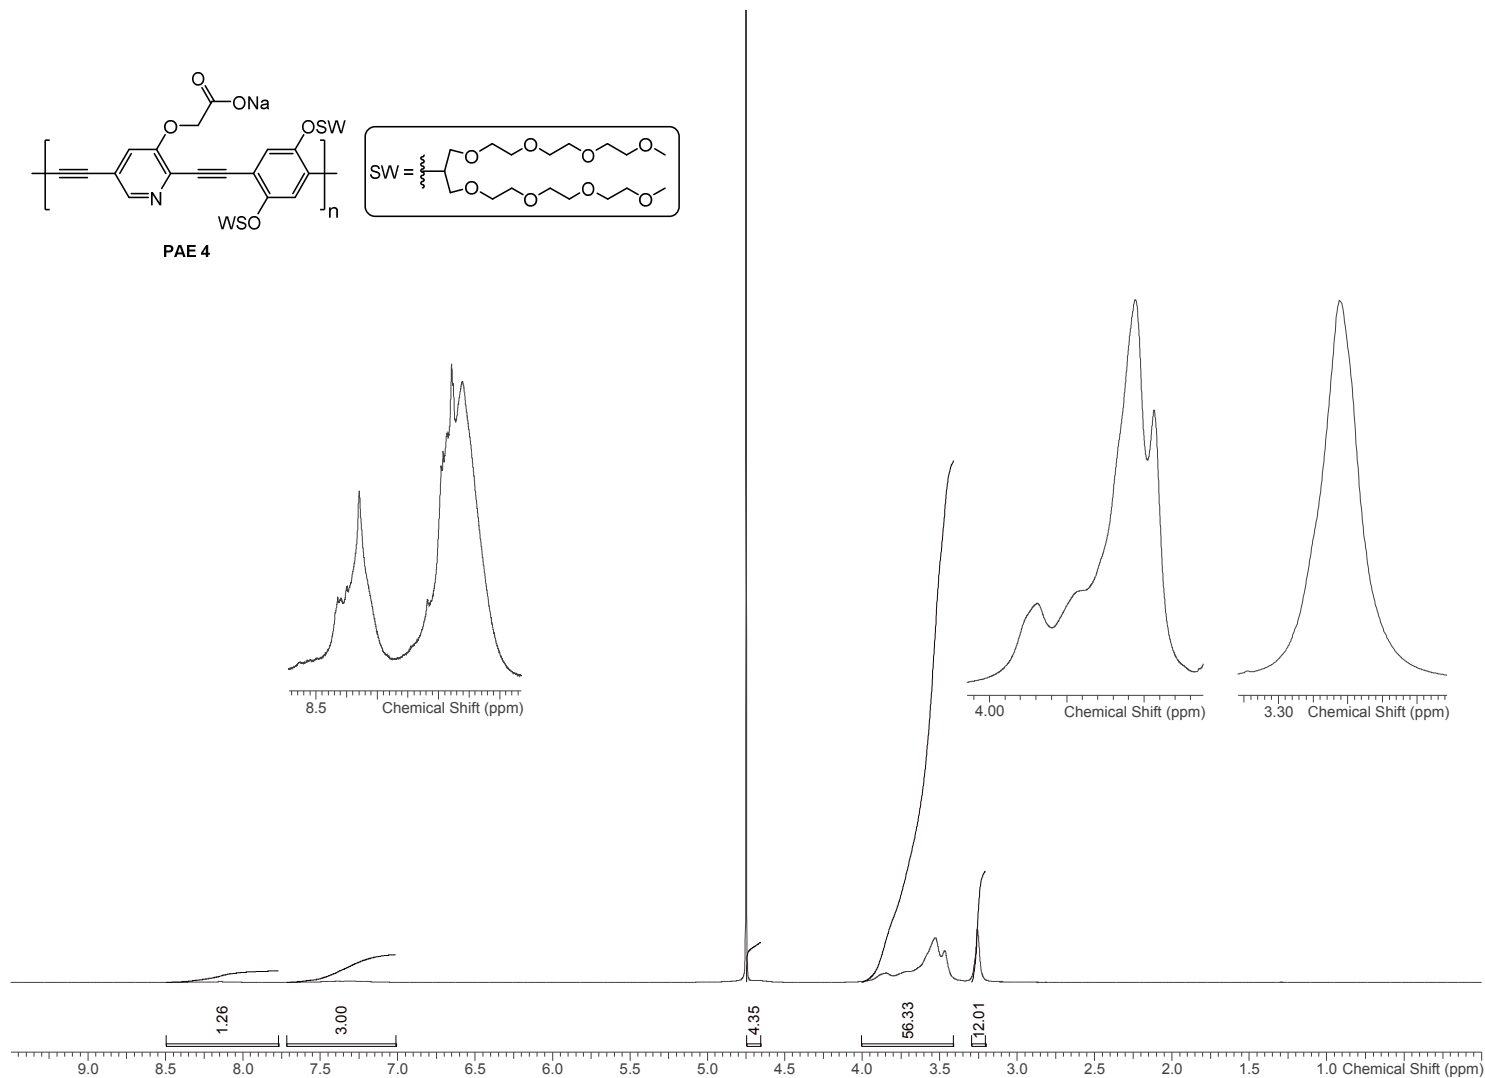

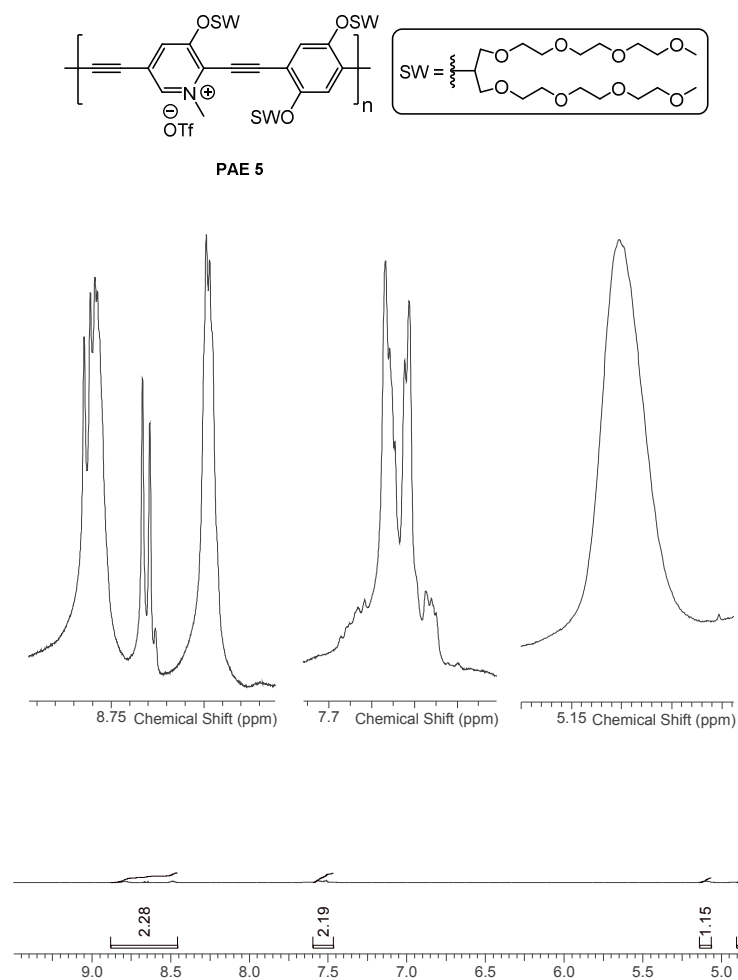

#### Current Data Parameters

NAME e140221ubks.35  
EXPNO 2  
PROCNO 1

#### F2 - Acquisition Parameters

Date 20140222  
Time 19.20  
INSTRUM spect  
PROBHD 5 mm CPQCI-1H-  
PULPROG zg30  
TD 131072  
SOLVENT D<sub>2</sub>O  
NS 128  
DS 2  
SWH 18028.846 Hz  
FIDRES 0.137549 Hz  
AQ 3.6350634 sec  
RG 13.85  
DW 27.733 usec  
DE 12.00 usec  
TE 295 K  
D1 0.1000000 sec  
TD0 16

#### ===== CHANNEL f1 =====

NUC1 1H  
P1 7.63 usec  
PLW1 7.5000000 W  
SFO1 600.2468302 MHz

#### F2 - Processing parameters

SI 65536  
SF 600.2438579 MHz  
WDW EM  
SSB 0  
LB 0.30 Hz  
GB 0  
PC 1.00

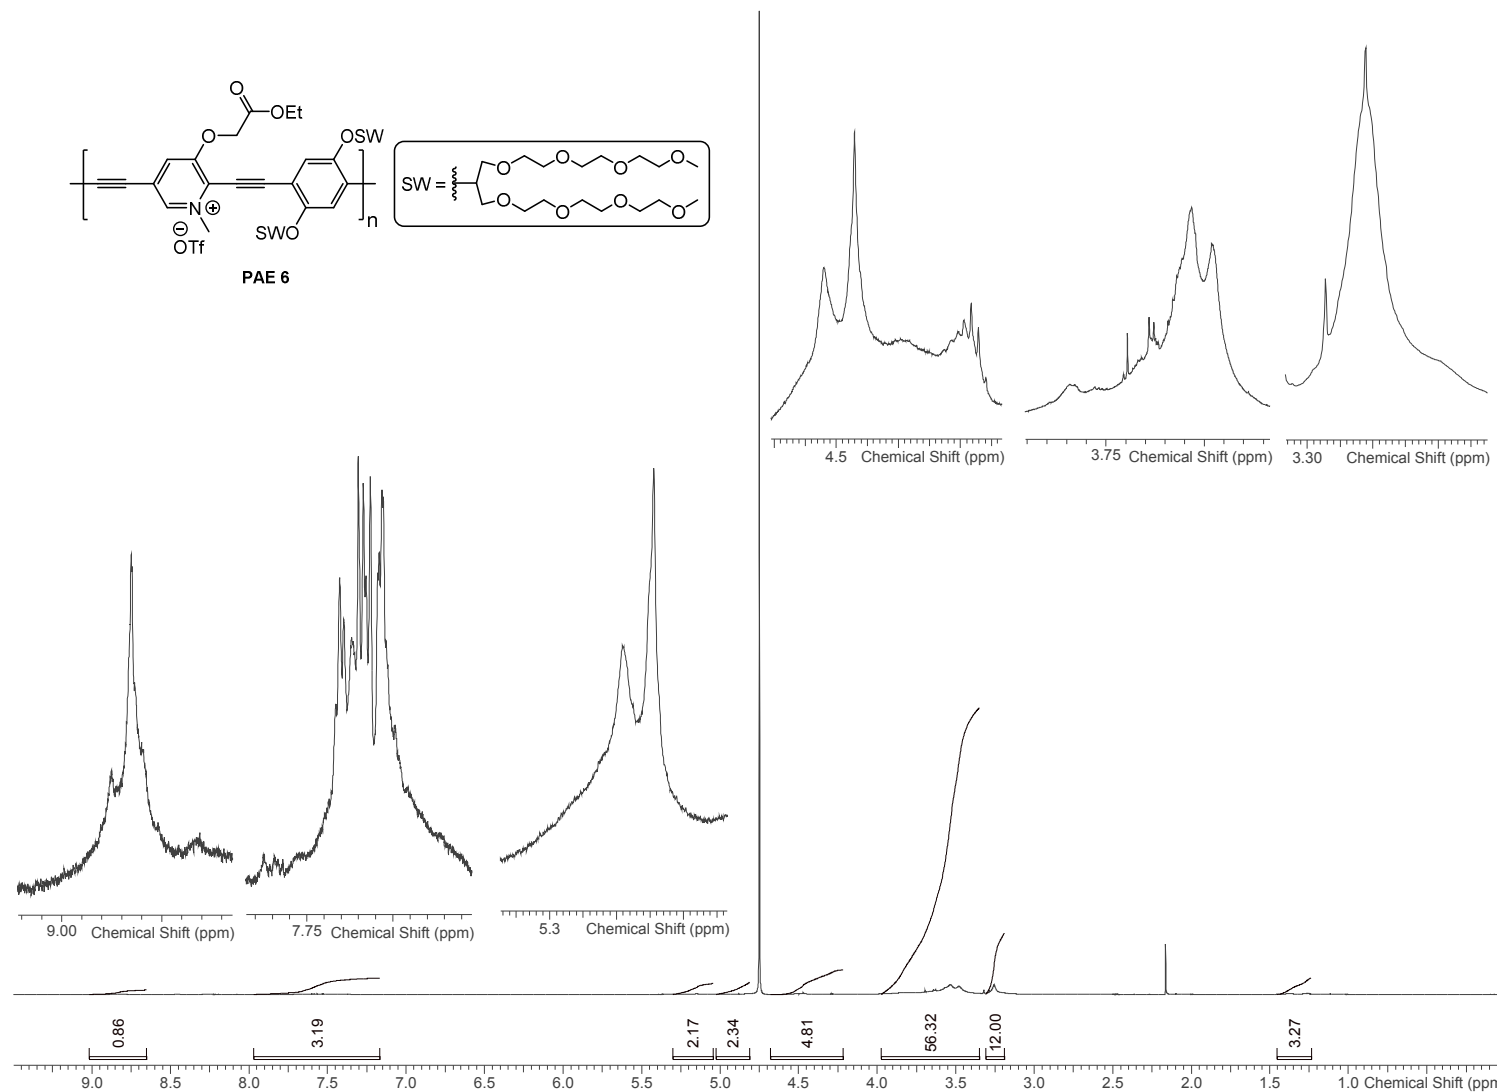

#### Current Data Parameters

NAME e140221ubks.34  
EXPNO 2  
PROCNO 1

#### F2 - Acquisition Parameters

Date 20140221  
Time 19.26  
INSTRUM spect  
PROBHD 5 mm CPQCI-1H-  
PULPROG zg30  
TD 131072  
SOLVENT D<sub>2</sub>O  
NS 128  
DS 2  
SWH 18028.846 Hz  
FIDRES 0.137549 Hz  
AQ 3.6350634 sec  
RG 16.84  
DW 27.733 usec  
DE 12.00 usec  
TE 295 K  
D1 0.1000000 sec  
TD0 16

#### ===== CHANNEL f1 =====

NUC1 1H  
P1 7.63 usec  
PLW1 7.5000000 W  
SFO1 600.2468302

#### F2 - Processing parameters

SI 65536  
SF 600.2438015  
WDW EM  
SSB 0  
LB 0.30 Hz  
GB 0  
PC 1.00

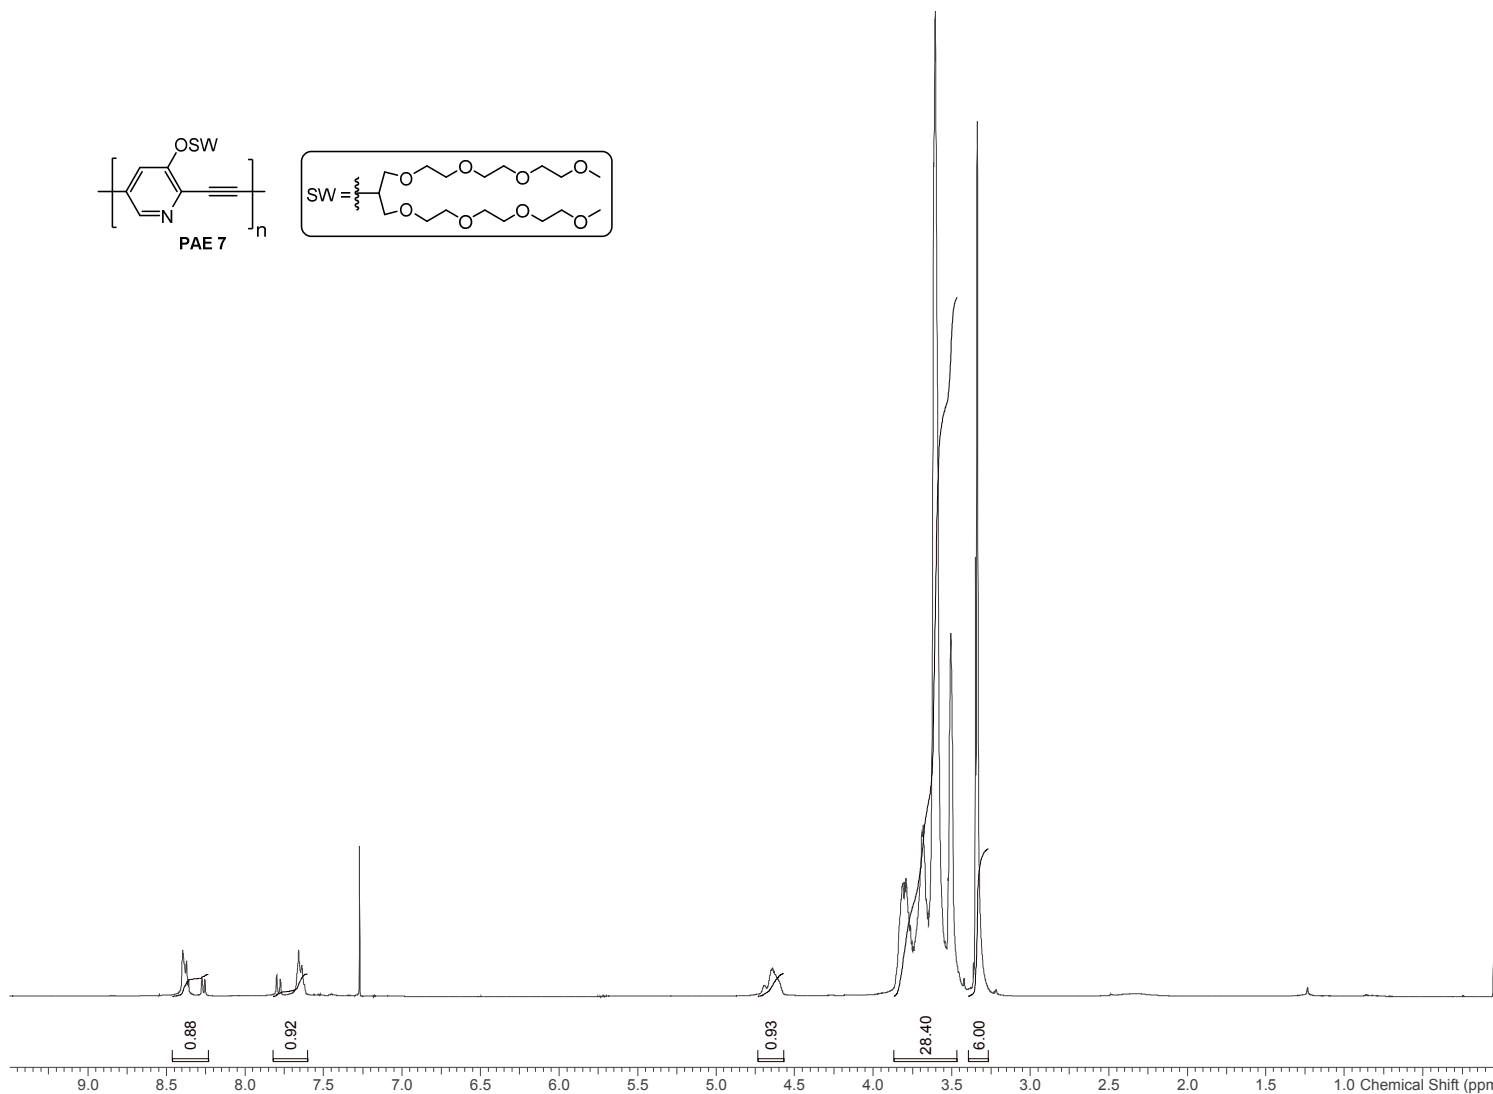

1.00



$$K_{SV} = 58.63 \pm 15.34$$
$$\log K_{SV} = 1.79 \pm 0.15$$
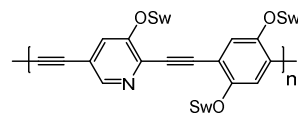

$$c(\text{Polymer}) = 6.14 \times 10^{-6} \text{ mol L}^{-1}$$

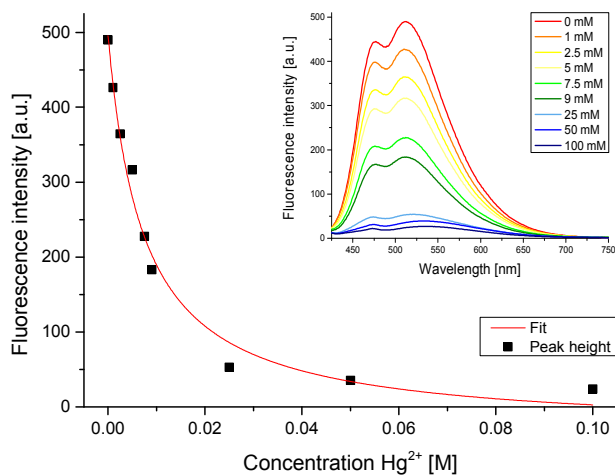
$$K_{SV} = 137.58 \pm 24.69$$

$$\log K_{SV} = 2.13 \pm 0.08$$
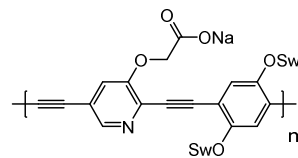

$$c(\text{Polymer}) = 2.31 \times 10^{-6} \text{ mol L}^{-1}$$

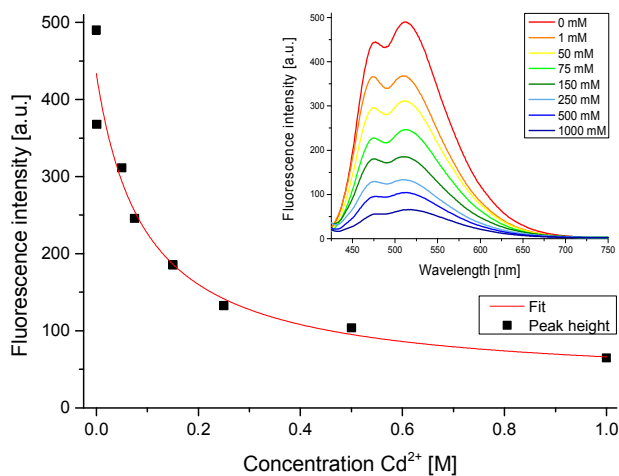

Quencher:  $\text{Cd}(\text{Cl})_2$

$$K_{SV} = 10.64 \pm 4.28$$

$$\log K_{SV} = 1.02 \pm 0.39$$

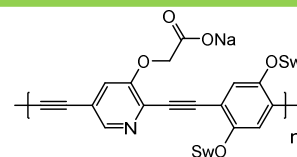

$$c(\text{Polymer}) = 2.31 \times 10^{-6} \text{ mol L}^{-1}$$

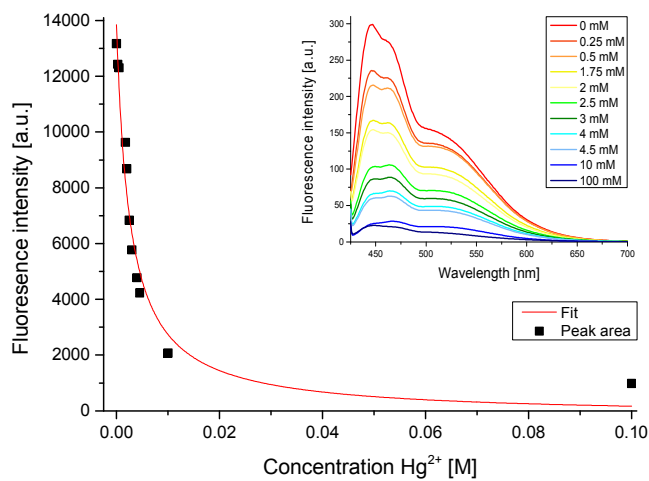

Quencher:  $\text{Hg}(\text{OAc})_2$

$$K_{SV} = 378.09 \pm 80.75$$

$$\log K_{SV} = 2.58 \pm 0.08$$

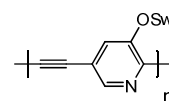

$$c(\text{Polymer}) = 4.14 \times 10^{-6} \text{ mol L}^{-1}$$

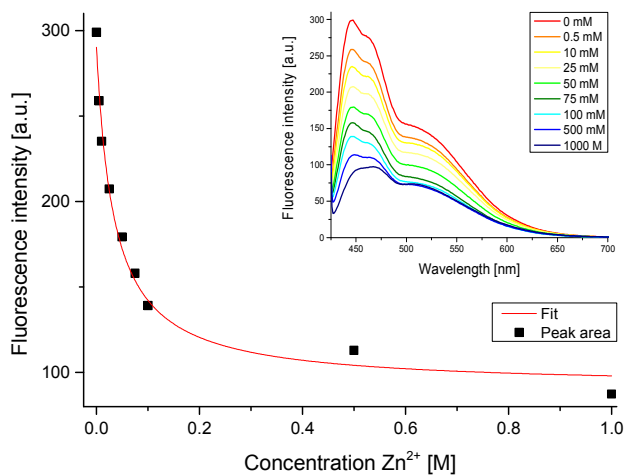

Quencher:  $\text{Zn}(\text{Cl})_2$

$$K_{SV} = 29.16 \pm 5.03$$

$$\log K_{SV} = 1.46 \pm 0.12$$

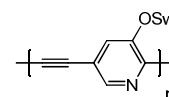

$$c(\text{Polymer}) = 4.14 \times 10^{-6} \text{ mol L}^{-1}$$

## 5. Supplemental References

- (1) Helmchen, G.; Nill, G.; Flockerzi, D.; Youssef, M. S. K. *Angew. Chem.* **1979**, *91*, 65-66; *Angew. Chem. Int. Ed.* **1979**, *18*, 63-65.
- (2) Fulmer, G. R.; Miller, A. J. M.; Sherden, N. H.; Gottlieb, H. E.; Nudelman, A.; Stoltz, B. M.; Bercaw, J. E.; Goldberg, K. I. *Organometallics* **2012**, *29*, 2176-2179.
- (3) Würth, C.; Grabolle, M.; Pauli, J.; Spieles, M.; Resch-Genger, U. *Nat. Protoc.* **2013**, *8*, 1535-1550.
- (4) (a) Kim, I.-B.; Phillips, R.; Bunz, U. H. F. *Macromolecules* **2007**, *40*, 5290-5293. (b) Khan, A.; Müller, S.; Hecht, S. *Chem. Commun.* **2005**, 584-586. (c) Lauter, U.; Meyer, W. H.; Eukelmann, V.; Wegner, G. *Macromolecules* **1998**, *199*, 2129-2140.
- (5) (a) Haydon, D. J.; Bennett, J. M.; Brown, B.; Collins, I.; Galbraith, G.; Lancett, P.; Macdonald, R.; Stokes, N. R.; Chauhan, P. K.; Sutariya, J. K.; Nayal, N.; Srivastava, A.; Beanland, J.; Hall, R.; Henstock, V.; Noola, C.; Rockley, C.; Czaplowski, L. *J. Med Chem.* **2010**, *53*, 3927-3936. (b) Berrie, A. H.; Newbold, G. T.; Spring, F. S. *J. Chem. Soc.* **1952**, 2042-2046.
